# Supplementary material for: Serum GFAP as a biomarker for progression in multiple sclerosis: assay comparison and a large reference database of healthy controls
Source: publisher site journal article supplement (doi:10.1515/cclm-2025-1480), 2025-12-27
Supplement: Supplementary file 1 [file j_cclm-2025-1480_suppl_001.docx]

Supplementary material

**Serum GFAP as a biomarker for progression in multiple sclerosis: assay comparison and a large reference database of healthy controls**

Eline A.J. Willemse, Sofia Sandgren, Pascal Benkert, et al.

Eline A.J. Willemse and Sofia Sandgren share first authorship.

Index Page

**Supplementary Table 1** Patient characteristics at initiation of fingolimod

therapy and at index sample2

**Supplementary Table 2** Patient characteristics at initiation of BCDT

and at index sample 3

**Supplementary Table 3** Linear regression model to assess a group effect

(HC versus pwMS) of the association between GFAPSimoa and GFAPElecsys 4

**Supplementary Figure 1** Method comparisons of GFAPSimoa and GFAPElescys

by Passing-Bablok regression analysis in fingolimod and BCDT cohorts 5-6

**Supplementary Table 1.** Patient characteristics at initiation of fingolimod therapy and at index sample

|  | Total |
| --- | --- |
| Patients (n) | 414 |
| Sex (women) | 269 (65.0) |
| Age, years | 40.3 [31.0-47.8] |
| BMI, kg2/m | 24.1 [21.4-26.9] |
| EDSS | 2.0 [1.5-3.0] |
| Disease duration, years | 6.6 [2.0-13.1] |
| Relapse <1 year before fingolimod initiation | 221 (53.4) |
| Follow-up duration after initiation of fingolimod, years | 9.1 [7.0-11.0] |
| PIRA event (n) | 130 (31.4) |
| Stay on fingolimod  Next DMT*  High efficacy DMT  Orals  Platform  Untreated  Follow-up <6M | 217 (52.4)  113 (27.3)  24 (5.7)  5 (1.2)  47 (11.4)  8 (1.9) |
| Time to treatment switch, years | 3.2 [1.3-5.9] |
| Time from treatment initiation to index sample, years | 1.0 [0.9-1.3] |
| At index sample |  |
| GFAPSimoa, ng/L | 75 [54-103] |
| GFAPElecsys, ng/L | 38 [27-51] |
| GFAPSimoa Z score | 0.2 [-0.7-1.0] |
| GFAPElecsys Z score | 0.2 [-0.8-1.0] |

Variables are expressed as n (%) or median [IQR]. *Patients having interrupted treatment for >6M after fingolimod stop were classified as “untreated”. Eight patients were followed for less than 6M after fingolimod cessation.

High efficacy DMT: alemtuzumab, natalizumab, ocrelizumab, ofatumumab, rituximab. Orals: dimethyl fumarate, teriflunomide, cladribine. Platform: interferon beta-1a and 1b, peginterferon beta-1a, glatiramer acetate.

Abbreviations: BMI, body-mass index; DMT, disease-modifying treatment; EDSS, expanded disability status scale; GFAP, glial fibrillary acidic protein; IQR, interquartile range; M, months; n, number; PIRA, progression independent of relapse activity; y, year.

**Supplementary Table 2.** Patient characteristics at initiation of BCDT and at index sample

|  | Total |
| --- | --- |
| Patients (n) | 353 |
| Sex (women) | 232 (65.7) |
| Age, years | 42.9 [32.9-52.1] |
| BMI, kg2/m | 24.0 [21.7-27.6] |
| EDSS | 3.0 [2.0-4.5] |
| Disease duration, years | 10.6 [4.3-18.6] |
| Relapse <1 year before BCDT initiation | 134 (38.0) |
| Follow-up duration after initiation of BCDT, years | 4.8 [3.6-5.7] |
| PIRA event (n) | 95 (26.9) |
| Treatment  Ocrelizumab  Rituximab | 251 (71.1)  102 (28.9) |
| Time from treatment initiation to index sample, years | 1.0 [0.9-1.3] |
| At index sample |  |
| GFAPSimoa, ng/L | 84.7 [59.5-120.8] |
| GFAPElecsys, ng/L | 42.1 [30.4-61.5] |
| GFAPSimoa Z score | 0.3 [-0.6-1.2] |
| GFAPElecsys Z score | 0.4 [-0.6-1.2] |

Variables are expressed as n (%) or median [IQR].

Abbreviations: BCDT, B-cell depleting therapy; BMI, body-mass index; EDSS, expanded disability status scale; GFAP, glial fibrillary acidic protein; IQR, interquartile range; PIRA, progression independent of relapse activity; y, year.

**Supplementary Table 3.** Linear regression model to assess a group effect (HC versus pwMS) of the association between GFAPSimoa and GFAPElecsys

|  | Estimate | 95% CI | p value |
| --- | --- | --- | --- |
| Log2(GFAPSimoa) | 1.846 | 1.747-1.950 | <0.0001 |
| Healthy controls versus pwMS | 1.340 | 0.871-2.062 | 0.1823 |
| Interaction log2(GFAPSimoa) * HC versus pwMS | 0.946 | 0.885-1.011 | 0.1030 |

Legend: The dependent variable in the model is log-transformed GFAPElecsys. Estimates were back-transformed and are presented as percentage changes. The interaction term was not significant, indicating no difference in the association between GFAPSimoa and GFAPElecsys.

Abbreviations: CI, confidence interval; GFAP, glial fibrillary acidic protein; HC, helathy controls; pwMS, people with multiple sclerosis.

**Supplementary Figure 1.** Method comparisons of GFAPSimoa and GFAPElescys by Passing-Bablok regression analysis in fingolimod and BCDT cohorts

A

| 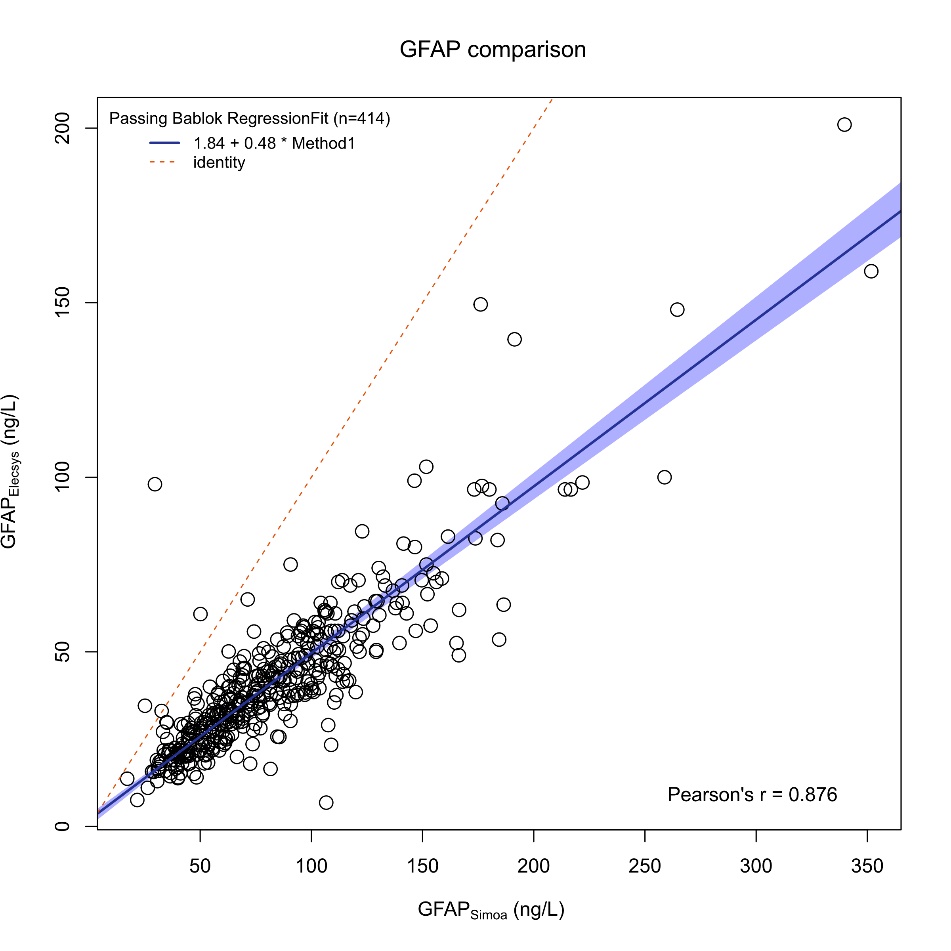 |
| --- |
| B  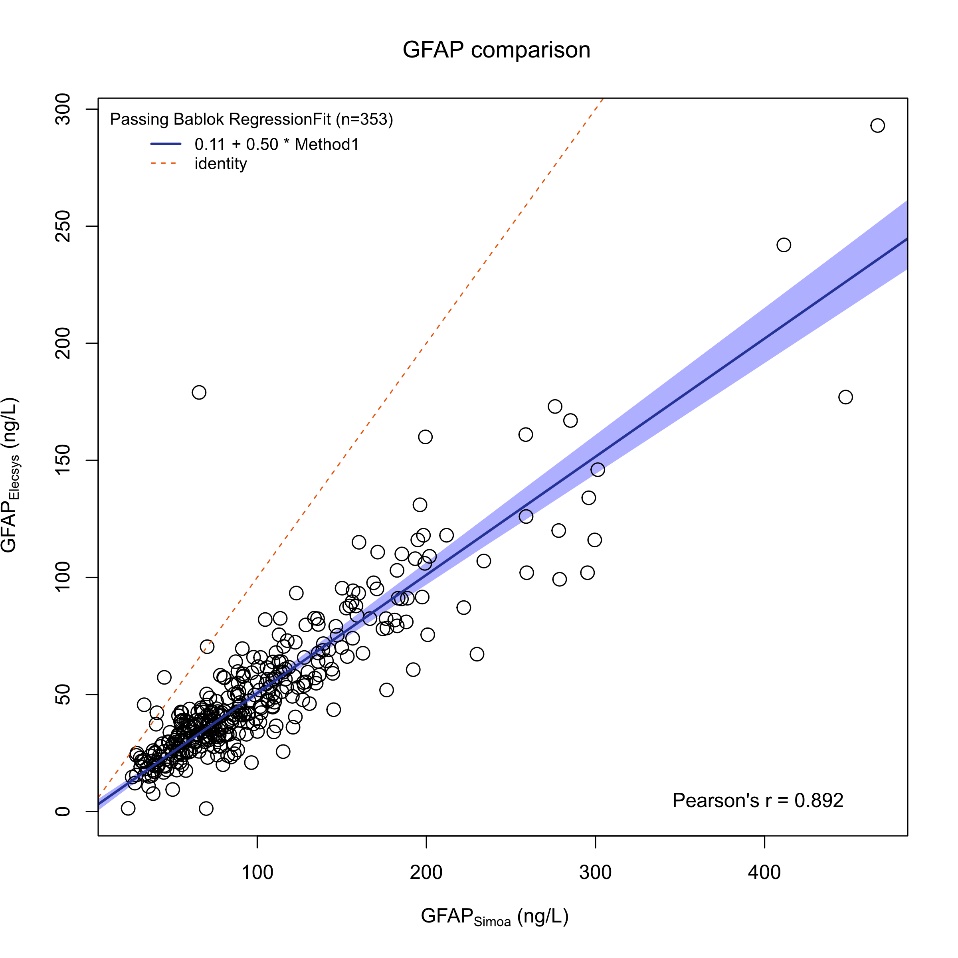 |

Legend: Scatter plots show individual serum GFAP concentrations measured using Simoa (x-axis) and Elecsys (y-axis) for the (A) fingolimod (n = 414) and (B) BCDT (n = 353) cohorts. Each plot includes the Passing-Bablok regression fit (solid black line) with 95% CIs (shaded area), and the line of identity (y = x, dashed line), indicating perfect agreement. The Pearson correlation coefficient (r) reflects the strength of the linear relationship between the two assays.

The conversion formula for the fingolimod cohort was: GFAPElecsys = 1.841 [95% CI 0.111 – 3.385] + 0.478 [0.454 – 0.504] * GFAPSimoa, and for the BCDT cohort: GFAPElecsys = 0.113 [95% CI -2.552 – 2.709] + 0.505 [0.474 – 0.541] * GFAPSimoa.

Abbreviations: BCDT, B-cell depleting therapy; CI, confidence interval; GFAP, glial fibrillary acidic protein; pwMS, people with multiple sclerosis.
